# Supplementary material
Source: PubMed Central journal article supplement (PMC6718287)
Supplement: EMS83665-supplement-Supporting_Information.pdf [file EMS83665-supplement-Supporting_Information.pdf]

# Supporting Information

## Mixed-charge pseudo-zwitterionic mesoporous silica nanoparticles with low-fouling and reduced cell uptake properties

Noemí Encinas<sup>a</sup>, Mercedes Angulo<sup>a</sup>, Carlos Astorga<sup>a</sup>, Montserrat Colilla<sup>a,b</sup>, Isabel Izquierdo-Barba<sup>a,b\*</sup>, María Vallet-Regí<sup>a,b\*</sup>

<sup>a</sup> *Chemistry in Pharmaceutical Sciences Department, Inorganic and Bioinorganic Chemistry Unit, Universidad Complutense de Madrid, Plaza Ramón y Cajal s/n, 28040 Madrid, Spain*

<sup>b</sup> *CIBER Bioengineering, Biomaterials and Nanomedicine, CIBER-BBN, Madrid, Spain*

### Equipment

Solution state nuclear magnetic resonance (NMR) spectra were recorded on a Bruker AVANCE AV-250 and a Bruker AVANCE AV-500 spectrometers. Chemical shifts ( $\delta$ ) are reported in ppm. <sup>1</sup>H and <sup>13</sup>C resonances were measured relative to internal deuterated solvent peaks considering TMS = 0 ppm.

HR-MAS NMR spectra were obtained on a Bruker AMX500MHz spectrometer equipped with a semisolid state probe. Measurements were performed in the solid state, by suspending the hybrid materials in a small amount of D<sub>2</sub>O.

Solid state magic angle spinning nuclear magnetic resonance (MAS NMR) and cross polarization magic angle spinning nuclear magnetic resonance (CP MAS NMR) spectra were obtained on a Bruker Avance AV-400WB spectrometer equipped with a solid state probe using a 4 mm zirconia rotor. Typical measurement conditions were as follows: <sup>13</sup>C NMR experiments were conducted with proton decoupling, the spectrometer frequency was set to 100.62 MHz (<sup>13</sup>C) and 400.13 MHz (<sup>1</sup>H) and MAS rotation rate was maintained at 6 kHz. The NMR spectra consisted of 15000 to 17500 acquisitions with cross-polarization contact times of 2 ms, 2.5  $\mu$ s pulse wide and a 5 s recycle delay. Chemical shift values were referenced at 176.1 ppm to carbonyl carbon of glycine. <sup>29</sup>Si NMR quantitative spectra were obtained at 79.49 MHz with MAS rotation rate of 12 kHz, a pulse wide of 4.5  $\mu$ s, a recycle delay of 5 s, and the number of scans was 17000 to 20000. <sup>29</sup>Si CP MAS NMR experiments were done setting the transmitter frequency to 79.49 MHz (<sup>29</sup>Si) and 400.13 MHz (<sup>1</sup>H), samples were spun to 12 kHz and a 5 s recycle delay, a 4.5  $\mu$ s pulse wide and a cross-polarization contact time of 3.5 ms were employed. All chemical shift values reported were externally referenced at 0 ppm to 3-(trimethylsilyl)-1-propanesulfonic acid sodium salt (DSS sodium salt).

Fourier transformed infrared (FTIR) spectra were collected in a Thermo Nicolet Nexus spectrometer equipped with a Goldengate attenuated total reflectance (ATR) device.

Chemical microanalyses were performed with a Perkin Elmer 2400 CHN and a LECO CHNS-932 thermo analyzers. Thermogravimetric analysis (TGA) and differential thermal analysis (DTA) were carried out in air between 30 and 800 °C with a flow rate of 100 mL/min and a heating rate of 5 °C/min using a Perkin Elmer Pyris Diamond thermobalance.

Ordered mesoporous materials were analyzed using powder X-ray diffraction at small angles (SA-XRD) in a Philips X'Pert Plus diffractometer (Philips Electronics NV, Eindhoven, Netherlands) with Bragg-Brentano geometry, operating with CuK $\alpha$  radiation ( $\lambda = 1.5406 \text{ \AA}$ ) at 40 kV and 20 mA. The diffractograms were collected over the range between  $0.6^\circ$  and  $10.0^\circ$   $2\theta$  with a step size of  $0.02^\circ$   $2\theta$  and a contact time of 5 s per step.

The surface characterisation of materials was carried out by N<sub>2</sub> adsorption/desorption analysis at  $-196^\circ\text{C}$  on a Micromeritics ASAP2020 analyser (Micromeritics Co, Norcross, USA). In all cases, 30-50 mg of the functionalized materials were outgassed under a vacuum lower than  $10^{-5}$  Torr during 24 h at  $60^\circ\text{C}$  prior to the measurements. The Brunauer-Emmett-Teller (BET) equation was used to calculate the surface area  $S_{\text{BET}}$ . Single-point total pore volume ( $V_{\text{T}}$ , cm<sup>3</sup>/g) was measured at  $P/P_0 \approx 0.97$ . The average mesopore size ( $D_{\text{p}}$ ) between 0.5 and 40 nm was obtained from the maximum of the pore size distribution curve calculated from the adsorption branch of the isotherm using the BJH (Barrett-Joyner-Halenda) method [<sup>1</sup>, <sup>2</sup>].

Electrophoretic mobility measurements of the materials suspended in water (0.1 mg/mL) were used to calculate the zeta-potential ( $\zeta$ ) values of the nanoparticles. Measurements were performed in a Zetasizer Nano-ZS instrument (Malvern) equipped with a 633 nm “red” laser.  $\zeta$ -potential can be described by Smoluchowski's equation [<sup>3</sup>]:  $\zeta = 4\pi\eta U/\epsilon$ , where  $U$  is the electrophoretic mobility,  $\eta$  is the viscosity of water, and  $\epsilon$  is the dielectric constant of water. The hydrodynamic size of mesoporous nanoparticles was measured by means of Dynamic Light Scattering (DLS) with the same Malvern instrument. Values presented are mean  $\pm$  SD from triplicate measurements.

SEM-EDS analysis was performed on a JEOL JSM 6335F microscope. For this purpose, samples were dispersed in ethanol and dried onto a copper stud and coated with a film of Cr previous to observation.

Transmission electron microscopy (TEM) was carried out with a JEOL JEM 1400 and JEOL JEM 2100 instruments equipped with a CCD camera (KeenView Camera) and operated at 120 and 200 kV, respectively. Sample preparation was performed by dispersing in ethanol and subsequent deposition onto carbon-coated copper grids.

---

[<sup>1</sup>] S. J. Gregg, K. S. W. Sing. Adsorption Surface Area and Porosity, 2nd ed. Academic Press, New York, 1982.

[<sup>2</sup>] S. Lowell, J. E. Shields, M. A. Thomas, M. Thommes. Characterization of Porous Solids and Powders: Surface Area, Pore Size and Density. Particle Technology Series, Vol. 16, 2004, Springer Science+Business Media B.V.

[<sup>3</sup>] M. V. Smoluchowski, Handbuch der Electricitat und des Magnetismus, Barth, Leipzig, Germany 1921, p. 366.

### Characterization of the samples:

TGA studies have been carried out in order to determine the organic content (functionalization and LEVO loaded) of the samples. In the case of non-functionalized MSNs (Fig. S1A), a weight loss of approximately 16.1% is observed up to 100 °C, attributed to the calcination of remaining organic matter (i.e. CTAB template). Functionalized ZMSN-1.5 and PEGylated nanoparticles present a first loss step below 100 °C (about 2%) corresponding to the elimination of adsorbed water on the silica surface. Further weight loss takes place in the range of 100-250 °C (22.4% for ZMSN-1.5 and 30.1% for PEG) confirming the effective functionalization of the nanoparticles. Furthermore, drug-loaded nanoparticles increase (Fig. S2B) the weight loss up to 23 and 26% (@MSN and @ZMSN-1.5, respectively). On the contrary, PEGylated NPs present a lower weight loss of about 20%, showing a higher loaded yield in *zwitterionic* materials.

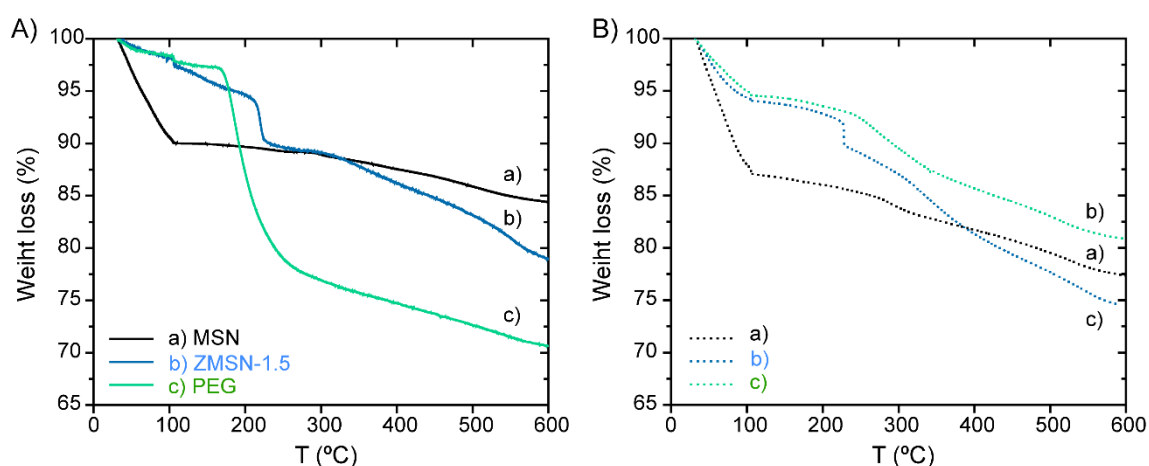

**Figure S1.** Thermogravimetric (TGA) analysis of the A) unloaded and B) LEVO containing a) pristine MSN, b) *zwitterionic* ZMSN-1.5 and c) PEGylated synthesized systems.

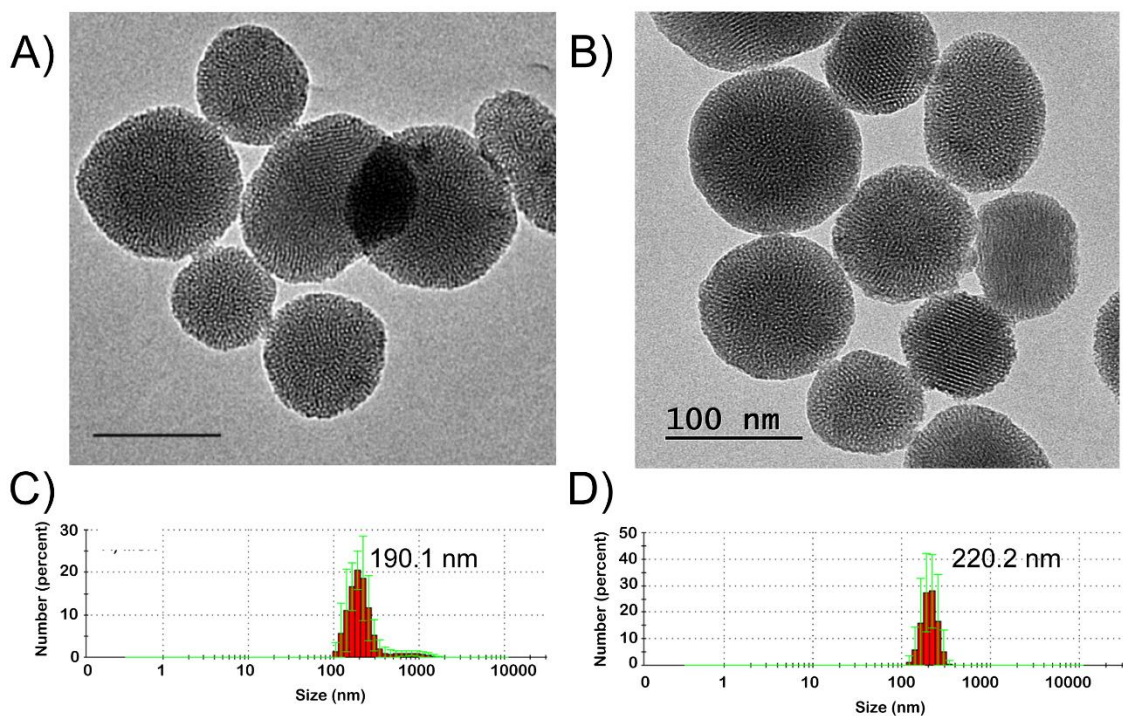

**Figure S2.** TEM images of A) bare MSNs and B) ZMSN-1.5 (*upper row*). DLS size histograms are displayed (*lower row*) for C) naked and D) modified nanoparticles.

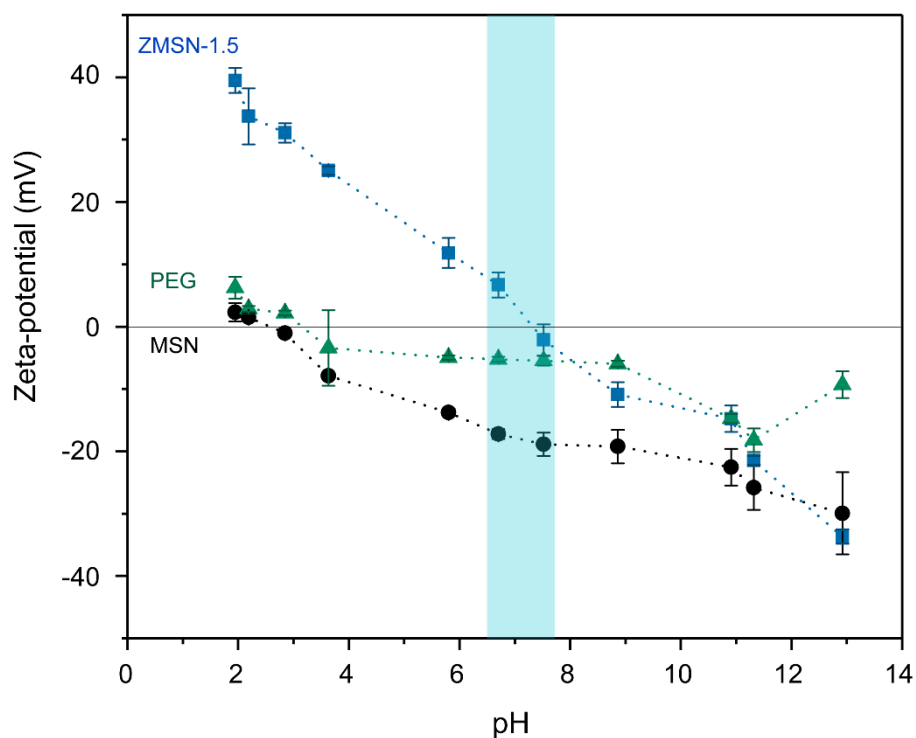

**Figure S3.**  $\zeta$ -potential variation with pH values for MSNs (black circles), ZMSN-1.5 (blue squares) and PEGylated (green triangles) systems.

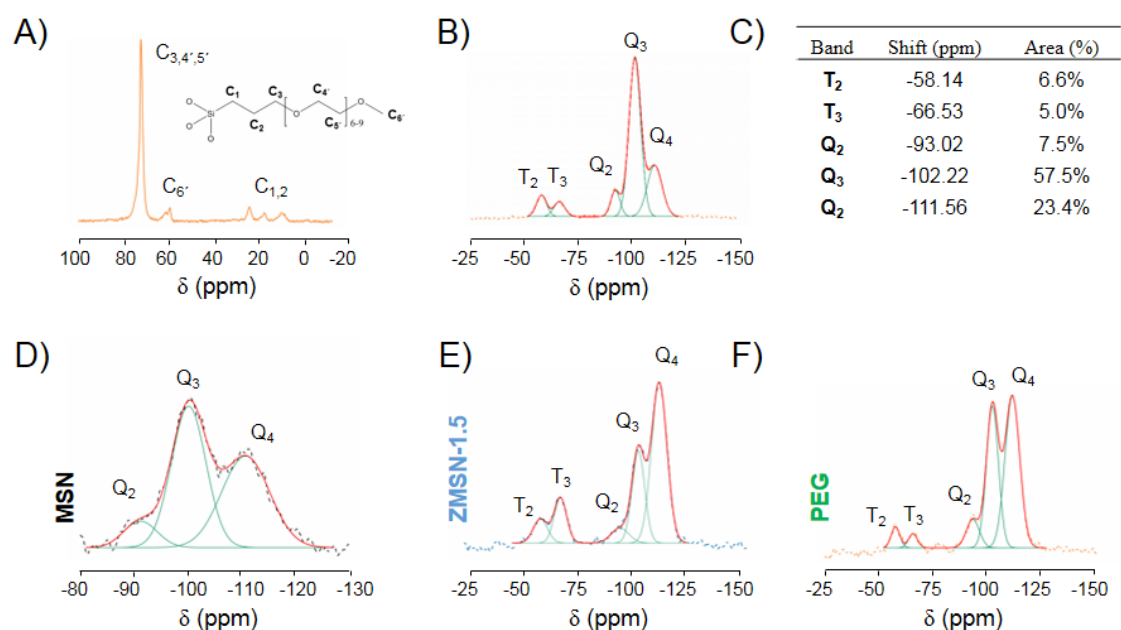

**Figure S4.** A)  $^1\text{H} \rightarrow ^{13}\text{C}$  CP-MAS NMR (showing the carbon assignment the structure scheme). B)  $^{29}\text{Si}$  MAS NMR spectra PEGylated nanoparticles, showing C) the chemical shift and peak area (%) of deconvoluted silicon  $\text{Q}_n$  and  $\text{T}_n$   $^{29}\text{Si}$  MAS NMR bands. Single-pulse  $^{29}\text{Si}$  MAS NMR spectra of D) MSN, E) ZMSN-1.5 and F) PEGylated systems.

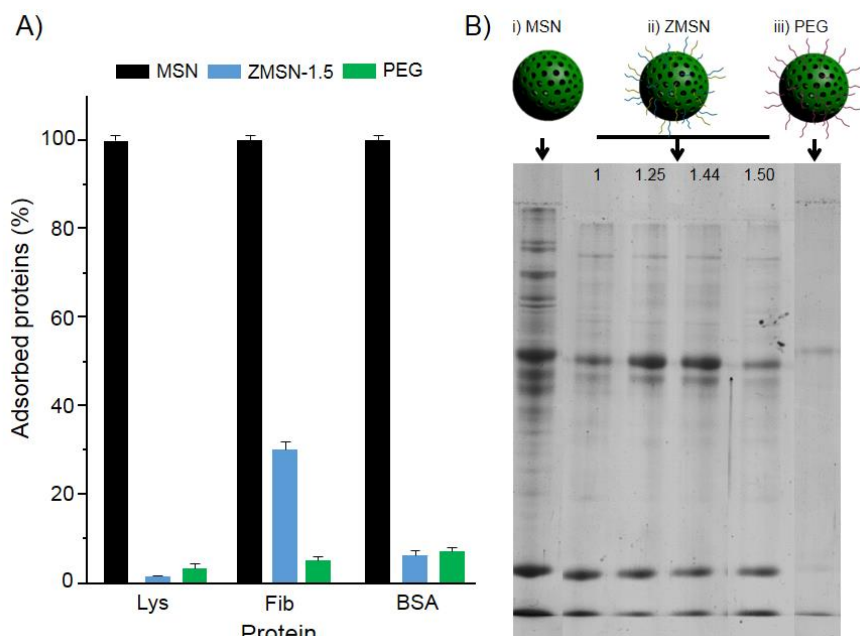

**Figure S5.** A) Percentage of adsorbed lysozyme (Lys), fibrinogen (Fib) and bovine serum albumin (BSA) on pristine MSNs, ZMSN-1.5 and PEGylated MCM-41 nanoparticles. B) Laemmli buffer gel electrophoresis results performed in fetal calf serum (FCS).

**Table S1.** Estimation of the ratio of total average fluorescence intensity from LSCM images arising from the nanoparticles ( $I_{\text{Total}}$ ) between those within the cells ( $I_{\text{Cell}}$ ) calculated by image analysis (FiJi software).

| Sample   | Estimated averaged $I_{\text{Total}} / I_{\text{Cell}}$ |
|----------|---------------------------------------------------------|
| MSN      | $37.1 \pm 6.5$                                          |
| ZMSN-1.5 | $16.8 \pm 6.8$                                          |
| PEG      | $7.7 \pm 2.8$                                           |

**Table S2.** Textural features ( $S_{\text{BET}}$ : surface area;  $D_p$ : pore diameter;  $V_p$ : pore volume) of pristine MSN and bi-functionalized zwitterionic ZMSN-1.5 obtained by  $N_2$  adsorption porosimetry.

| Sample        | $S_{\text{BET}}$ ( $\text{m}^2\text{g}^{-1}$ ) <sup>[a]</sup> | $D_p$ (nm) <sup>[b]</sup> | $V_p$ ( $\text{cm}^3\text{g}^{-1}$ ) <sup>[c]</sup> |
|---------------|---------------------------------------------------------------|---------------------------|-----------------------------------------------------|
| MSN           | 1041                                                          | 2.4                       | 1.20                                                |
| MSN@LEVO      | 331                                                           | 2.3                       | 0.41                                                |
| ZMSN-1.5      | 500                                                           | 2.3                       | 0.48                                                |
| ZMSN-1.5@LEVO | 143                                                           | 1.9                       | 0.22                                                |
